# Supplementary material
Source: ML conference proceedings conference paper supplement (https://proceedings.mlr.press/v119/agarwal20b.html)
Supplement: Supplementary file [file agarwal20b-supp.pdf]

## A. Appendix

### A.1. Proof of Theorem 3.3

*Proof of Theorem 3.3.* Since  $\mathcal{A}^i$  satisfies inequality 3, we have that

$$\sum_{t=1}^T \left( \ell_t^i(u_{t-H+1}, \dots, u_t) - \ell_t^i(u_{t-H+1}^f, \dots, u_t^f) \right) \leq R(T) + 2T\varepsilon. \quad (9)$$

Denote  $j^- = t - j + 1$  for brevity. Define for any  $i \in [N]$ ,  $t \in [T]$ , and any  $\ell_t \in \mathcal{L}'$  loss function encountered by the booster,

$$\Delta_{t,i} \triangleq \ell_t(\mathbf{0}, u_{H-}^i, \dots, u_t^i) - \ell_t(\mathbf{0}, u_{H-}^f, \dots, u_t^f).$$

Denote  $\Delta_i = \sum_t \Delta_{t,i}$ . Notice that by  $\alpha$ -strongly convexity 5 of  $\ell_t$ , as long as we choose  $\eta_i \leq \frac{\alpha}{\beta}$ , we have

$$\begin{aligned} \ell_t^i(u_{t-H+1}^f, \dots, u_t^f) &= \sum_{j=1}^H \frac{\eta_i \beta}{2} \|u_{t-H+j}^f - u_{t-H+j}^{i-1}\|^2 + \\ &\sum_{j=1}^H \left( \nabla_j^\top (u_{t-H+j}^f - u_{t-H+j}^{i-1}) \right) \\ &\leq \ell_t(\mathbf{0}, u_{t-H+1}^f, \dots, u_t^f) - \ell_t(\mathbf{0}, u_{t-H+1}^{i-1}, \dots, u_t^{i-1}). \end{aligned}$$

Thus by summing them up we get

$$\sum_{t=1}^T \ell_t^i(u_{t-H+1}^\pi, \dots, u_t^\pi) \leq -\Delta_{i-1} \quad (10)$$

Consider the following calculations for  $\Delta_{t,i}$ :

$$\begin{aligned} \Delta_{t,i} &= \ell_t \left( \mathbf{0}, u_{H-}^{i-1} + \eta_i (\mathcal{A}^i(x_{H-}) - u_{H-}^{i-1}), \dots, \right. \\ &\quad \left. u_t^{i-1} + \eta_i (\mathcal{A}^i(x_t) - u_t^{i-1}) \right) - \ell_t(\mathbf{0}, u_{H-}^\pi, \dots, u_t^\pi) \\ &\text{(by substituting } u_t^i \text{ as in line 7 of Algorithm 2)} \\ &\leq \ell_t(\mathbf{0}, u_{H-}^{i-1}, \dots, u_t^{i-1}) - \ell_t(\mathbf{0}, u_{H-}^\pi, \dots, u_t^\pi) + \\ &\quad \sum_{j=1}^H \left( \eta_i \nabla_j^\top (\mathcal{A}^i(x_{t-H+j}) - u_{t-H+j}^{i-1}) \right. \\ &\quad \left. + \frac{\eta_i^2 \beta}{2} \|\mathcal{A}^i(x_{t-H+j}) - u_{t-H+j}^{i-1}\|^2 \right) \end{aligned}$$

(by convexity and  $\beta$ -smoothness of  $\ell_t$ )

By summing  $\Delta_{t,i}$  over  $t \in [T]$ , we have that

$$\begin{aligned} \Delta_i &\leq \sum_{t=1}^T \left( (\ell_t(\mathbf{0}, u_{H-}^{i-1}, \dots, u_t^{i-1}) - \ell_t(\mathbf{0}, u_{H-}^\pi, \dots, u_t^\pi)) + \right. \\ &\quad \left. \eta_i \sum_{j=1}^H \left( \nabla_j^\top (\mathcal{A}^i(x_{t-H+j}) - u_{t-H+j}^{i-1}) \right. \right. \\ &\quad \left. \left. + \frac{\eta_i \beta}{2} \|\mathcal{A}^i(x_{t-H+j}) - u_{t-H+j}^{i-1}\|^2 \right) \right) \\ &= \sum_{t=1}^T \left( (\ell_t(\mathbf{0}, u_{H-}^{i-1}, \dots, u_t^{i-1}) - \ell_t(\mathbf{0}, u_{H-}^\pi, \dots, u_t^\pi)) + \right. \\ &\quad \left. \eta_i \ell_t^i(\mathcal{A}^i(x_{H-}), \dots, \mathcal{A}^i(x_{1-})) \right) \\ &\leq \sum_{t=1}^T \left( (\ell_t(u_{H-}^{i-1}, \dots, u_t^{i-1}) - \ell_t(u_{H-}^\pi, \dots, u_t^\pi)) + \right. \\ &\quad \left. \eta_i \ell_t^i((u_{t-H+1}^\pi, \dots, u_t^\pi)) \right) + \eta_i (R(T) + 2T\varepsilon) \\ &\text{(by the weak-controller regret bound 9)} \\ &\leq (1 - \eta_i) \Delta_{i-1} + \eta_i (R(T) + 2T\varepsilon) \quad \text{(by inequality 10)} \end{aligned}$$

Choosing  $\eta_i = \frac{\alpha}{\beta}$ , then by noticing  $\Delta_i$  is always upper bounded by a convex combination of  $\Delta_0$  and  $(R(T) + 2T\varepsilon)$ , we have

$$\begin{aligned} \Delta_i &\leq \left(1 - \frac{\alpha}{\beta}\right)^i \Delta_0 + \left(1 - \left(1 - \frac{\alpha}{\beta}\right)^i\right) (R(T) + 2T\varepsilon) \\ &\leq \left(1 - \frac{\alpha}{\beta}\right)^i 2GT + R(T) + 2T\varepsilon \end{aligned}$$

plugging  $i = N$  in finishes our proof.  $\square$
